# Supplementary material for: Rigid organic molecule pillared Ti3C2 towards high rate capability and fast sodium ion storage
Source: Royal Society of Chemistry journal article supplement (doi:10.1039/d4nr05144k), 2025-01-01
Supplement: d4nr05144k1.pdf [file d4nr05144k1.pdf]

Supporting Information

**Rigid organic molecule pillared Ti<sub>3</sub>C<sub>2</sub> towards high rate capability and fast sodium ion storage**

Cai-Xia Zheng<sup>a, b</sup>, Ai-Jun Jiao<sup>c</sup>, Zhen-Hai Fu<sup>c\*</sup>, Yu-Xia Hu<sup>a, d</sup>, Min-Peng Li<sup>a, b</sup>, Hong-Yan Li<sup>a, b</sup>, Wei-Hai Yi<sup>a, b</sup>, Xiao-Rui Wang<sup>a, b</sup>, Meng-Chao Liu<sup>a, b</sup>, Fu-liang Zhu<sup>a, b\*</sup>, Mao-Cheng Liu<sup>a, b\*</sup>

<sup>a</sup>State Key Laboratory of Advanced Processing and Recycling of Non-ferrous Metals, Lanzhou University of Technology, Lanzhou 730050, People's Republic of China

<sup>b</sup>School of Materials Science and Engineering, Lanzhou University of Technology, Lanzhou 730050, People's Republic of China

<sup>c</sup>Key Laboratory of Green and High-end Utilization of Salt Lake Resources, Qinghai Institute of Salt Lakes, Chinese Academy of Sciences, Xining, 810008, People's Republic of China

<sup>d</sup>School of Bailie Engineering and Technology, Lanzhou City University, Lanzhou 730050, People's Republic of China

\* E-mail: fzh@isl.ac.cn, chzfl@126.com, liumc@lut.edu.cn

## Material Characterization

Scanning electron microscope SEM (JSM-6701F) and transmission electron microscope TEM (JEM-2010) were used to analyze the micromorphology and structure of  $Ti_3C_2$  and  $Ti_3C_2$ -BTCA. The chemical state of elements of samples was measured by XPS (AXIS-SUPRA). FTIR was tested to discover the appearance of a new chemical bond in  $Ti_3C_2$ -BTCA. The  $N_2$  adsorption/desorption curves were tested by the surface area and pore size analyzer (JW-BK200). The XRD patterns were investigated by a Rigaku D/MAX 2400 diffractometer with  $Cu-K\alpha$  radiation ( $\lambda = 0.154$  nm), and the calculation of interlayer spacing was done using the Bragg equation<sup>[1]</sup> :

$$d = \frac{\lambda}{2\sin\theta_{(002)}} \quad \begin{matrix} S \\ 1 \end{matrix}$$

## Electrochemical Measurement

$Ti_3C_2$ -BTCA and other comparable active substances, Super P and PVDF binders were uniformly applied to copper foils at a ratio of 8:1:0.5, and half cells were assembled in an Ar atmosphere glove box.

Sodium-ion half-cells were assembled using sodium metal as the counter-electrode, copper foil coated with active substance as the working electrode, a Whatman GF/D type membrane and an organic electrolyte of 1.0 M  $NaPF_6$  (EC:DC:DMC=1:1:1); The sodium metal electrode was also replaced by aluminium foil coated with activated carbon as the anode and the above electrode material as the cathode to form the sodium ion capacitor. The electrochemical data were tested using a LAND, CT2001 A and an electrochemical workstation (CHI660D) and the impedance was tested using an AUTOLAB AC impedance meter (PGSTAT T100N).

**All the formulas you need to use in the article:**

The relationship between the peak current (*i*) at the redox peak and the sweep rate was used to investigate the storage of sodium ions:

$$i = a \cdot v^b \quad S2$$

where *a* and *b* are available and *b* depends on the slope of S3:

$$\log(i) = b \cdot \log(v) + \log(a) \quad S3$$

When the *b* value is close to 1.0, it indicates surface capacitance control behavior, and when the *b* value is close to 0.5, it represents diffusion control capacitance behavior<sup>[2]</sup>.

The diffusion contribution and the percentage of capacitance can be calculated according to the following equations:

$$i = k_1 v + k_2 v^{1/2} \quad S4$$

Here *k*<sub>1</sub> and *k*<sub>2</sub> are constants, *k*<sub>1</sub>*v* denotes the surface control capacitance and *k*<sub>2</sub>*v*<sup>1/2</sup> denotes the diffusion control capacitance contribution<sup>[3]</sup>.

From the constant current intermittent titration technique (GITT), the sodium ion diffusion coefficient was calculated according to the following equation:

$$D_{ions} = \frac{4l^2 \Delta E_s}{\pi\tau (\Delta E_t)^2} \quad S5$$

where *L* is the thickness of the ions through the electrode material, *τ* is the chirp time,  $\Delta E_s$  is the pulse induced voltage drop and  $\Delta E_t$  is the voltage difference during constant current charging/discharging<sup>[4]</sup>.

Specific capacitance formula for sodium ion capacitors:

$$C_m = \frac{I \cdot \Delta t}{m \cdot \Delta v} \quad S6$$

Formula to calculate the energy density.

$$E = \frac{1}{2} C_m \cdot \Delta t^2 \quad S7$$

Power density calculation:

$$P = \frac{E}{\Delta t} \quad S8$$

Where  $I(A)$  is the discharge current,  $\Delta t(s)$  is the discharge time,  $m(g)$  is the mass of the total active material at the positive and negative electrodes, and  $\Delta v(V)$  is the potential difference<sup>[5]</sup>.

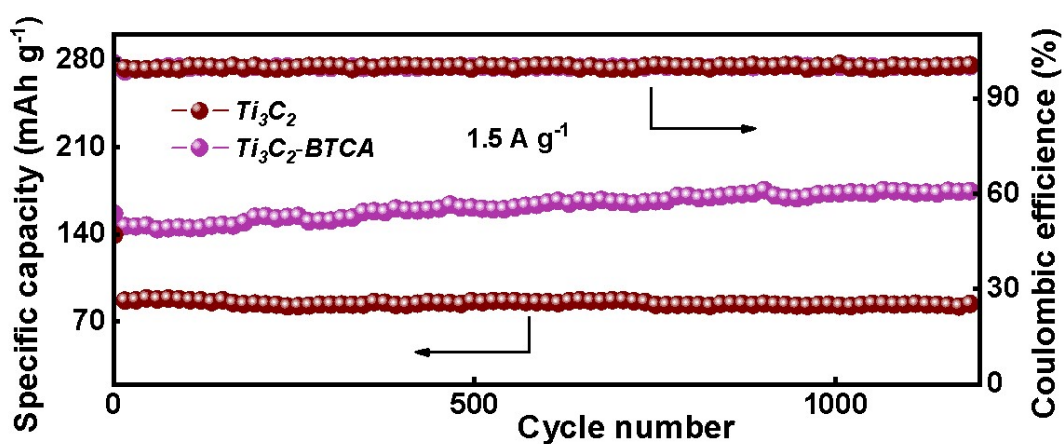

Figure S1. Cycle stability of  $Ti_3C_2$  and  $Ti_3C_2$ -BTCA at  $1.5 A g^{-1}$

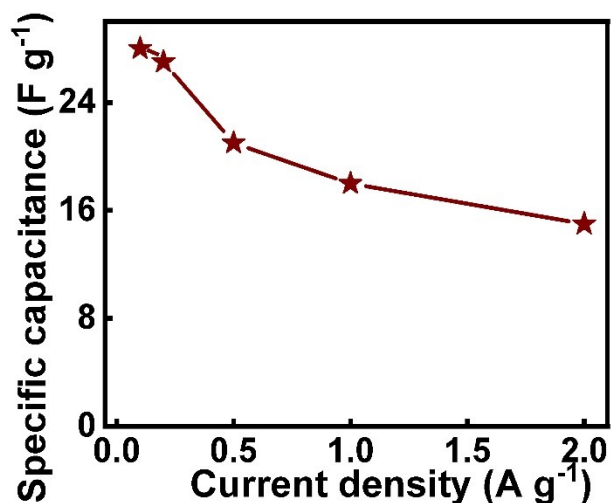

Figure S2. Specific capacity at different current densities of  $Ti_3C_2$ -BTCA||AC SIC.

The calculated specific capacities of  $Ti_3C_2$ -BTCA||AC SIC are 27.8, 24.2, 20.6, 17.7,

15.2, and 12 F g<sup>-1</sup>, corresponding to 0.1, 0.2, 0.5, 1.0, 2.0 and 5.0 A g<sup>-1</sup>, which can be obtained according to S6.

**Table S1.** Electrochemical performance y of Ti<sub>3</sub>C<sub>2</sub>-BTCA compared to previous reports

| Anode material                                                   | Specific capacity (mAh g <sup>-1</sup> ) | Max.current density (A g <sup>-1</sup> ) | Cycle numbers | Reference        |
|------------------------------------------------------------------|------------------------------------------|------------------------------------------|---------------|------------------|
| MoS <sub>2</sub> / Ti <sub>3</sub> C <sub>2</sub> T <sub>x</sub> | 162.7                                    | 1                                        | 100           | 6                |
| Co <sub>3</sub> C/MXene                                          | 105                                      | 2                                        | 100           | 7                |
| N/O-C@TiO <sub>2</sub>                                           | 165                                      | 1                                        | 1000          | 8                |
| V <sub>4</sub> C <sub>3</sub> T <sub>x</sub> - C                 | 128                                      | 1                                        | 100           | 9                |
| Sb <sub>2</sub> O <sub>3</sub> / Ti <sub>3</sub> C <sub>2</sub>  | 295                                      | 2                                        | 100           | 10               |
| Na <sub>2</sub> Ti <sub>3</sub> O <sub>7</sub> / C               | 110                                      | 1                                        | 500           | 11               |
| P-Ti <sub>3</sub> C <sub>2</sub> T <sub>x</sub>                  | 140                                      | 0.1                                      | 150           | 12               |
| <b>Ti<sub>3</sub>C<sub>2</sub>-BTCA</b>                          | 182.3                                    | 5                                        | 2000          | <b>This work</b> |

## References

- [1] Y. Sun, S. Li, Y. Zhuang, G. Liu, W. Xing and W. Jing, *Journal of Membrane Science*, 2019, **591**, 117350.
- [2] L. Miao, Z. Wang, J. Peng, W. Deng, W. Chen, Q. Dai and T. Ueyama, *Separation and Purification Technology*, 2022, **296**, 121441.
- [3] B. Zhang, A. Boretti and S. Castelletto, *Chemical Engineering Journal*, 2022, **435**, 134959.

- [4] J. Tang, X. Huang, T. Qiu, X. Peng, T. Wu, L. Wang, B. Luo and L. Wang, *Chemistry - A European Journal*, 2020, **27**, 1921–1940.
- [5] E. Engmann, L. A. Diaz, T. E. Lister, Abderrahman Atifi, Olena Palasyuk and H. Zhao, *Electrochimica Acta*, 2024, **478**, 143860–143860.
- [6] Y. Wu, P. Nie, J. Jiang, B. Ding, H. Dou and X. Zhang, *ChemElectroChem*, 2017, **4**, 1560–1565.
- [7] H. Zhang, D. Xiong, Y. Xie, K. Wu, Z. Feng, K. Wen, Z. Li and M. He, *Colloids and Surfaces a Physicochemical and Engineering Aspects*, 2022, **656**, 130332–130332.
- [8] Z. Zhang, M. Liu, Y. Xie, Z. Guo, H. Feng and H. Wang, *Inorganic Chemistry*, 2022, **61**, 8887–8897.
- [9] K. Subramanyan, S. Chen, N. Li, T. Ma, Y. Liu, S. Chandrasekaran and V. Aravindan, *Electrochimica Acta*, 2023, **437**, 141505.
- [10] X. Guo, X. Xie, Soo Jung Choi, Y. Zhao, Hao Liu, C. Wang, S. Chang and G. Wang, *Journal of materials chemistry. A, Materials for energy and sustainability*, 2017, **5**, 12445–12452.
- [11] S. Nie, L. Liu, M. Li, J. Liu, J. Xia, Y. Zhang and X. Wang, *ChemElectroChem*, 2018, **5**, 3498–3505.
- [12] K. Ming, Z. Zhang and H. Li, *Journal of Materials Science*, 2022, **57**, 14959–14968.
